# Supplementary material for: Global profiling reveals common and distinct N6-methyladenosine (m6A) regulation of innate immune responses during bacterial and viral infections
Source: PubMed Central journal article supplement (PMC8921188; doi:10.1038/s41419-022-04681-4), 2022-03-14

### Supplementary Figure 8

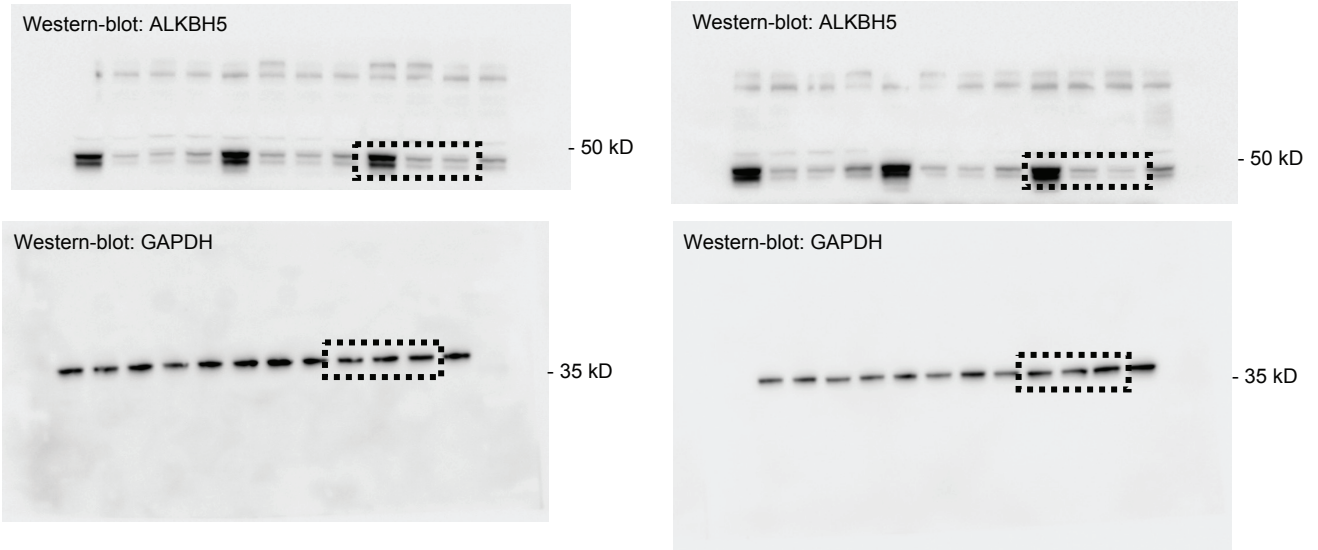

### Supplementary Figure 10

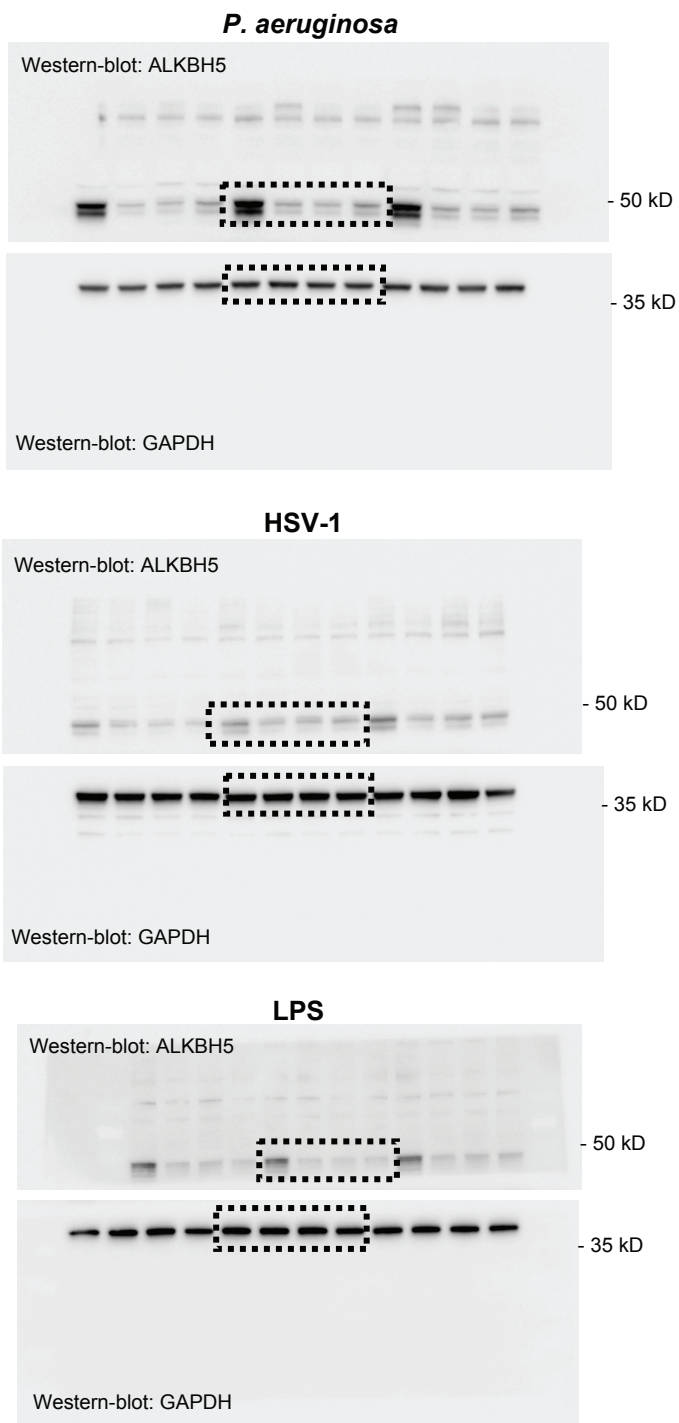

Supplement: 41419_2022_4681_MOESM2_ESM.pdf [file 41419_2022_4681_MOESM2_ESM.pdf]
